# Supplementary material for: Drying of potable water treatment plant residuals
Source: Royal Society of Chemistry journal article supplement (doi:10.1039/c9dt02908g), 2009-01-01
Supplement: c9dt02908g1.pdf [file c9dt02908g1.pdf]

## Supporting Information

### Sub-Nanometer Cu(I) Cluster: Coordination-modulated (Se vs S)

#### Atom-Packing Mode and Emission

Feng Ke,<sup>a,b</sup> Yongbo Song,<sup>a,b\*</sup> Hao Li,<sup>a,b</sup> Chuanjun Zhou,<sup>a,b</sup> Yuanxin Du,<sup>a,b</sup> and Manzhou Zhu<sup>a,b\*</sup>

<sup>a</sup>Department of Chemistry and Centre for Atomic Engineering of Advanced Materials, Anhui Province Key Laboratory of Chemistry for Inorganic/Organic Hybrid Functionalized Materials, Anhui University, Hefei, Anhui 230601, People's Republic of China.

<sup>b</sup>Key Laboratory of Structure and Functional Regulation of Hybrid Materials, Anhui University, Ministry of Education, Anhui 230601, People's Republic of China.

**Corresponding authors:** [ybsong860@ahu.edu.cn](mailto:ybsong860@ahu.edu.cn) (Y.S.); [zmz@ahu.edu.cn](mailto:zmz@ahu.edu.cn) (M.Z.)

#### 1. Experimental

##### 1.1 Chemical

Copper(I) chloride ( $\text{CuCl}$ ,  $\geq 99.95\%$ , metals basis), phenthiole ( $\text{PhSH}$ ,  $\geq 99.9\%$ ), phenylselenol ( $\text{PhSeH}$ ,  $\geq 99.9\%$ ), triphenylphosphine ( $\text{PPh}_3$ ,  $\geq 98\%$ ), sodium borohydride ( $\text{NaBH}_4$ ,  $\geq 99.99\%$ ), methylene chloride ( $\text{CH}_2\text{Cl}_2$ , HPLC,  $\geq 99.9\%$ ), acetonitrile ( $\text{CH}_3\text{CN}$ , HPLC,  $\geq 99.9\%$ ), methanol ( $\text{CH}_3\text{OH}$ , HPLC,  $\geq 99.9\%$ ), ethanol ( $\text{CH}_3\text{CH}_2\text{OH}$ , HPLC,  $\geq 99.9\%$ ). All reagents were used as received without further purification. All glassware was thoroughly cleaned with aqua regia ( $\text{HCl} : \text{HNO}_3 = 3 : 1 \text{ vol}\%$ ), rinsed with copious pure water, and then dried in an oven prior to use.

##### 1.2 Synthesis and crystallization of $\text{Cu}_{13}(\text{SePh})_{13}(\text{Ph}_3\text{P})_4$ clusters.

$\text{CuCl}$  (40.0 mg, 0.40 mmol) was dissolved in 3 mL  $\text{CH}_3\text{CN}$ , and  $\text{PhSeH}$  (30  $\mu\text{L}$ , 0.28 mmol) was dissolved in 15 mL methylene chloride. These two solutions were blended in a 100 mL flask. The solution was vigorously stirred with a magnetic stirring for 30 min. Then,  $\text{Ph}_3\text{P}$  (60 mg, 0.23 mmol, dissolved in 2 mL methylene chloride) were quickly added to the above solution. After ~30 min stirring,  $\text{NaBH}_4$  (40 mg, 1.06 mmol, dissolved in 5 mL ice-cold nanopure water) were quickly added to the flask. The color of the solution changed from colorless transparency to black and finally to yellow transparent. The reaction was allowed to proceed 12 h at room temperature. After removing the aqueous phase, the mixture in the organic phase was dried and washed several times with  $\text{CH}_3\text{OH}$  to remove the redundant  $\text{PhSeH}$  and byproducts.

The  $\text{Cu}_{13}(\text{SePh})_{13}(\text{Ph}_3\text{P})_4$  clusters were crystallized in  $\text{CH}_2\text{Cl}_2/\text{CH}_3\text{OH}$  for 3 – 4 days at room temperature. Yellow transparent crystals were collected, and the structure of  $\text{Cu}_{13}$  was determined by X-ray crystallography.

##### 1.3 Synthesis and crystallization of $\text{Cu}_8(\text{SPh})_8(\text{Ph}_3\text{P})_4$ clusters.

The  $\text{Cu}_8(\text{SPh})_8(\text{Ph}_3\text{P})_4$  cluster was synthesized with the similar synthetic method to that of  $\text{Cu}_{13}$  cluster, just changing the ligands from PhSeH to PhSH. The  $\text{Cu}_8$  clusters were also crystallized in  $\text{CH}_2\text{Cl}_2/\text{CH}_3\text{OH}$  at room temperature. After 3 - 4 days, the green transparent crystals of  $\text{Cu}_8$  were obtained.

#### 1.4 The ligand-exchange of $\text{Cu}_8$ cluster with PhSeH.

10 mg  $[\text{Cu}_8(\text{SPh})_8(\text{Ph}_3\text{P})_4]$  clusters were dissolved in 10 mL  $\text{CH}_2\text{Cl}_2$ . And then 10  $\mu\text{L}$  PhSeH was added to the solution at room temperature. After  $\sim 8$  hours, the mixture in the organic phase was dried, and then washed several times with  $\text{CH}_3\text{OH}$  to remove the redundant PhSeH and byproducts. The product was proved by fluorescence spectrometer, which shows same emission spectrum to that of  $\text{Cu}_{13}$  cluster (Fig. S4). Furthermore, the product was also crystallized in  $\text{CH}_2\text{Cl}_2/\text{CH}_3\text{OH}$  at room temperature, the crystal was determined by X-ray crystallography, which possesses same structure to that of  $\text{Cu}_{13}$  clusters (see detailed data in Section 2.1). These results demonstrate that the  $[\text{Cu}_{13}(\text{SePh})_{13}(\text{Ph}_3\text{P})_4]$  also can be obtained by ligand-exchange from  $\text{Cu}_8$  clusters.

## 2. Characterization

### 2.1 X-ray crystallographic determination of the Cu(I) clusters.

A suitable crystal was selected and performed on a 'Bruker APEX-II CCD' diffractometer. The crystal was kept at 296(2) K during data collection. Using Olex2<sup>[1]</sup>, the structure was solved with the ShelXT<sup>[2]</sup> structure solution program using Intrinsic Phasing and refined with the ShelXL<sup>[3]</sup> refinement package using Least Squares minimisation.

1. Dolomanov, O.V., Bourhis, L.J., Gildea, R.J, Howard, J.A.K. & Puschmann, H. (2009), *J. Appl. Cryst.* 42, 339-341.
2. Sheldrick, G.M. (2015). *Acta Cryst.* A71, 3-8.
3. Sheldrick, G.M. (2015). *Acta Cryst.* C71, 3-8.

**Crystal Data for  $\text{Cu}_{13}$  obtained by one-pot method:**  $\text{C}_{159}\text{H}_{143}\text{Cl}_{18}\text{Cu}_{13}\text{P}_4\text{Se}_{13}$  ( $M = 4668.21$  g/mol), triclinic, space group P-1,  $a = 17.6959(19)$  Å,  $b = 19.509(2)$  Å,  $c = 25.994(3)$  Å,  $\alpha = 79.2200(10)^\circ$ ,  $\beta = 87.641(2)^\circ$ ,  $\gamma = 63.6130(10)^\circ$ ,  $V = 7888.1(15)$  Å<sup>3</sup>,  $Z = 2$ ,  $T = 296(2)$  K,  $\mu(\text{MoK}\alpha) = 5.110$  mm<sup>-1</sup>,  $D_{\text{calc}} = 1.965$  g/cm<sup>3</sup>, 61767 reflections measured ( $2.598^\circ \leq 2\theta \leq 54.28^\circ$ ), 31370 unique ( $R_{\text{int}} = 0.0523$ ,  $R_{\text{sigma}} = 0.1056$ ) which were used in all calculations. The final  $R_1$  was 0.0620 ( $I > 2\sigma(I)$ ) and  $wR_2$  was 0.752 (all data).

**Crystal Data for  $\text{Cu}_{13}$  obtained by ligand-exchange method:**  $\text{C}_{150}\text{H}_{125}\text{Cu}_{13}\text{P}_4\text{Se}_{13}$  ( $M = 3903.87$  g/mol), triclinic, space group P-1,  $a = 17.726(5)$  Å,  $b = 19.518(5)$  Å,  $c = 26.004(7)$  Å,  $\alpha = 79.241(3)^\circ$ ,  $\beta = 87.730(3)^\circ$ ,  $\gamma = 63.544(3)^\circ$ ,  $V = 7903(4)$  Å<sup>3</sup>,  $Z = 2$ ,  $T = 296(2)$  K,  $\mu(\text{MoK}\alpha) = 4.788$  mm<sup>-1</sup>,  $D_{\text{calc}} = 1.641$  g/cm<sup>3</sup>, 61346 reflections measured ( $1.596^\circ \leq 2\theta \leq 54.684^\circ$ ), 31403 unique ( $R_{\text{int}} = 0.0671$ ,  $R_{\text{sigma}} = 0.1292$ ) which were used in all calculations. The final  $R_1$  was 0.0771 ( $I > 2\sigma(I)$ ) and  $wR_2$  was 0.2261 (all data).

**Crystal Data for  $\text{Cu}_8$  obtained by one-pot method:**  $\text{C}_{120}\text{H}_{100}\text{Cu}_8\text{P}_4\text{S}_8$  ( $M = 2430.67$  g/mol), triclinic, space group P-1,  $a = 12.1898(12)$  Å,  $b = 14.6213(14)$  Å,  $c = 17.0179(16)$  Å,  $\alpha = 73.7510(10)^\circ$ ,  $\beta = 70.7900(10)^\circ$ ,  $\gamma = 78.4410(10)^\circ$ ,  $V = 2730.1(5)$  Å<sup>3</sup>,  $Z = 1$ ,  $T = 296.15$  K,  $\mu(\text{MoK}\alpha) = 1.787$  mm<sup>-1</sup>,  $D_{\text{calc}} = 1.478$  g/cm<sup>3</sup>, 21401 reflections measured ( $2.604^\circ \leq 2\theta \leq$

54.752°), 10887 unique ( $R_{\text{int}} = 0.0256$ ,  $R_{\text{sigma}} = 0.0444$ ) which were used in all calculations. The final  $R_1$  was 0.0432 ( $I > 2\sigma(I)$ ) and  $wR_2$  was 0.1210 (all data).

**2.2 Electro spray ionization mass spectrometry (ESI-MS)** measurements is performed on MicroTOF-QIII high-resolution mass spectrometer. The samples are directly infused into the chamber at 5  $\mu\text{L}/\text{min}$ .

**2.3 X-ray photoelectron spectroscopy (XPS)** measurements were performed on Thermo ESCALAB 250 equipped with a monochromated Al  $K\alpha$  (1486.8 eV) 150 W X-ray source, 0.5mm circular spot size, a flood gun to counter charging effects, and the analysis chamber base pressure lower than  $1 \times 10^{-9}$  mbar; data were collected with FAT = 20 eV.

**2.4 Photoluminescence (PL)** spectra were measured on a FL-4500 spectrofluorometer with the same optical density (OD)  $\sim 0.05$ . In these experiments, all fluorescence spectra were measured in the solid state of the clusters.

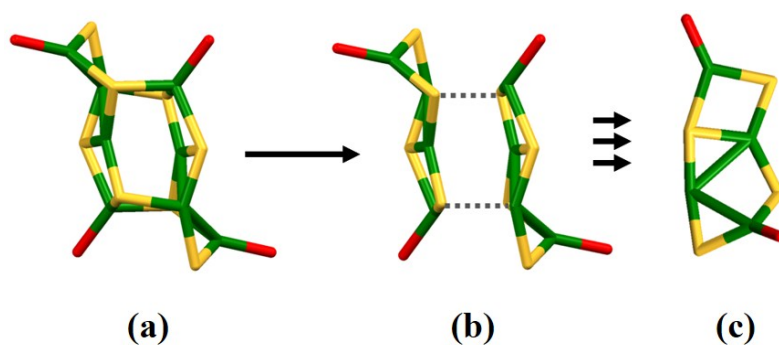

**Fig. S1** Structural analysis of Cu<sub>8</sub> cluster: (a) and (b) top view; (c) side view of Cu<sub>4</sub>S<sub>4</sub>P<sub>2</sub> unit. Color labels: green = Cu; red = P; orange = S.

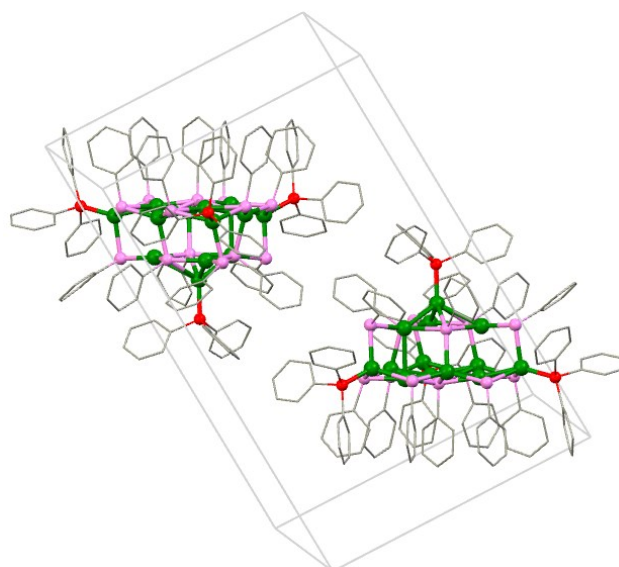

**Fig. S2** Total structure of the Cu<sub>13</sub> cluster. The unit cell contains a pair of left- and right-handed isomers. Color labels: green = Cu; red = P; violet = Se; gray = C.

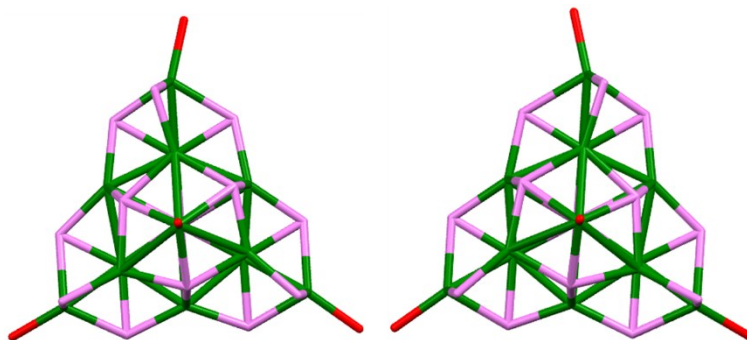

**Fig. S3** Top views of two molecules of  $\text{Cu}_{13}$  in the same unit cell, which shows  $\text{Cu}_{13}$  is a chiral cluster. All of the C and H atoms are omitted for clarity.

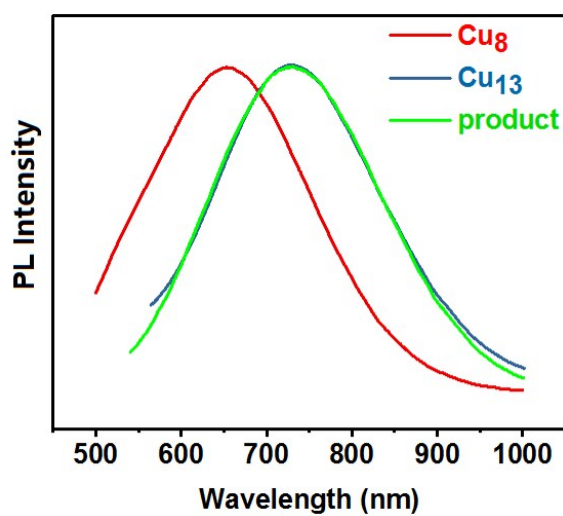

**Fig. S4** Solid-state emission ( $\lambda_{\text{ex}} = 405 \text{ nm}$ ) spectra of  $\text{Cu}_8$ ,  $\text{Cu}_{13}$  and the products obtained by ligand-exchange from  $\text{Cu}_8$ .

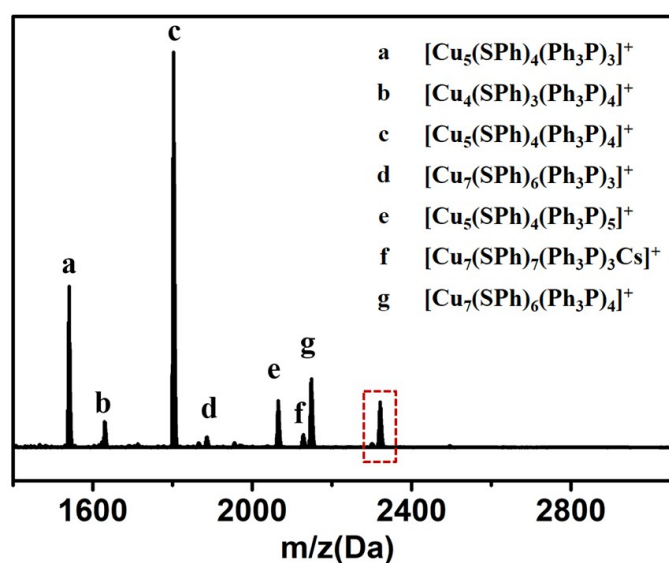

**Fig. S5** ESI-MS spectrum of  $\text{Cu}_8$  (in positive mode with adding  $\text{Cs}^+$ ) and the assignment of the fragmentary peaks.

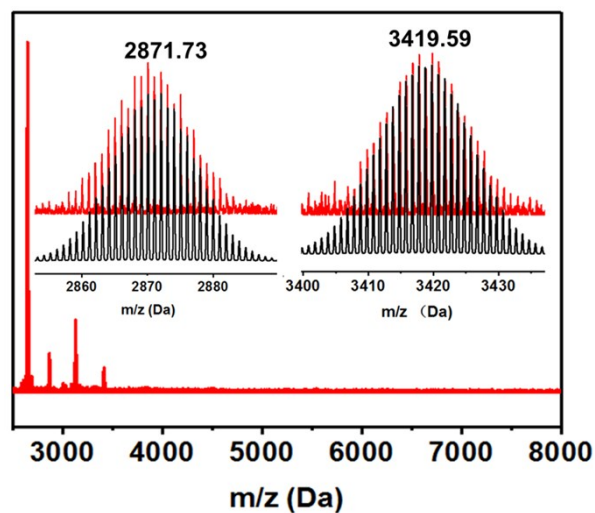

**Fig. S6** The ESI mass spectra of  $\text{Cu}_{13}$  without adding  $\text{Cs}^+$  in positive mode (inset: the comparison of the experimental and simulated isotope patterns).

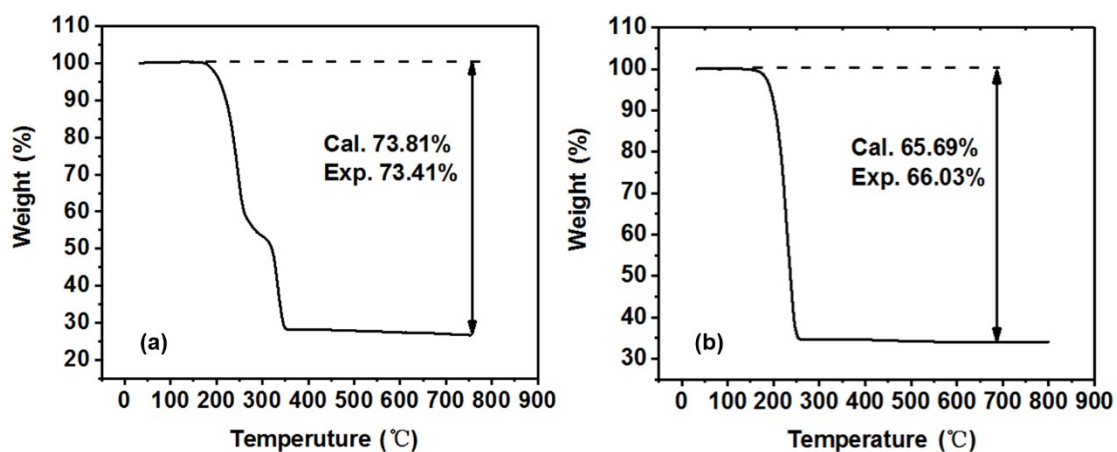

**Fig. S7** TGA curves of  $\text{Cu}_8$  (a) and  $\text{Cu}_{13}$  (b). Note: based on their weight loss, the product after calcination was assigned as  $\text{Cu}_2\text{S}$  and  $\text{Cu}_2\text{Se}$ , respectively.

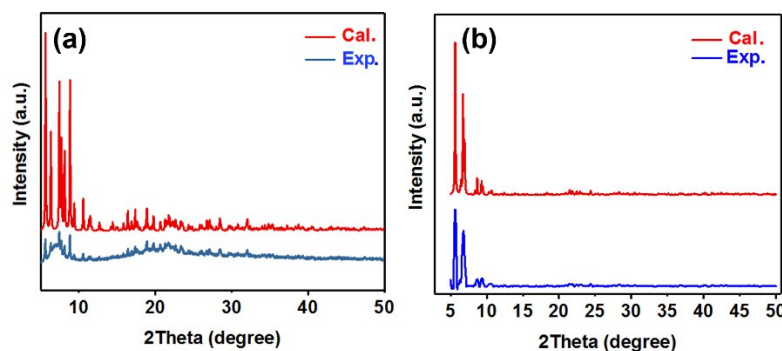

**Fig. S8** Comparison of the experimental and theoretical powder X-ray diffraction curves of  $\text{Cu}_8$  (a) and  $\text{Cu}_{13}$  (b).

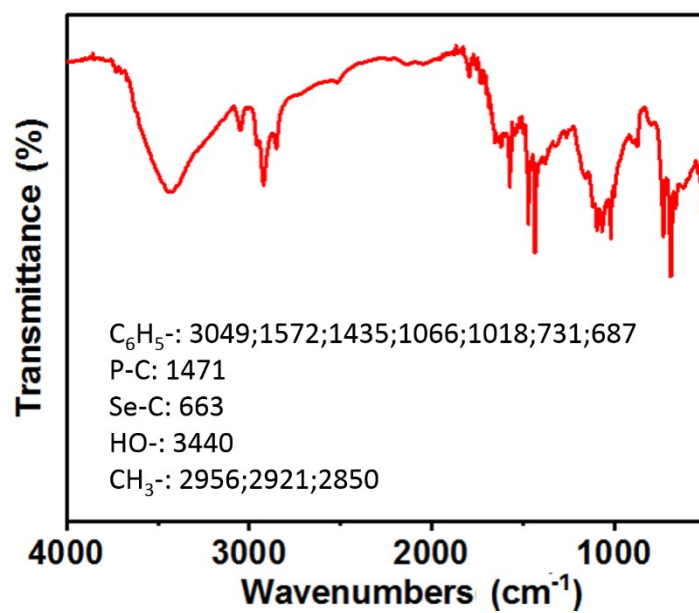

**Fig. S9** The infrared spectroscopy of Cu<sub>13</sub>, and the identification of correlation peaks.

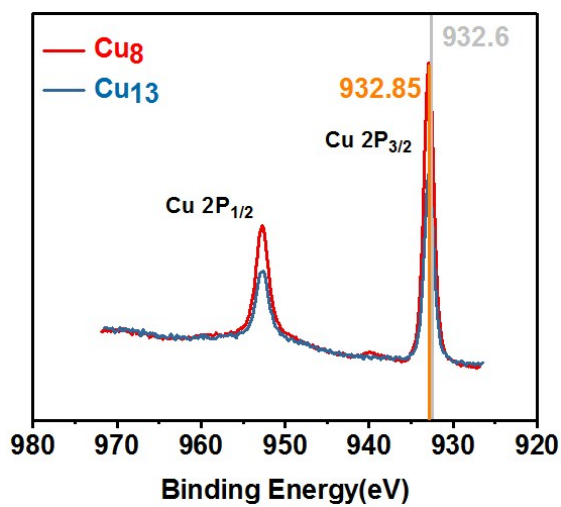

**Fig. S10** XPS spectra of Cu<sub>8</sub> (red) and Cu<sub>13</sub> (blue). Note: the binding energy of Cu(0) is 932.6 eV (gray line).

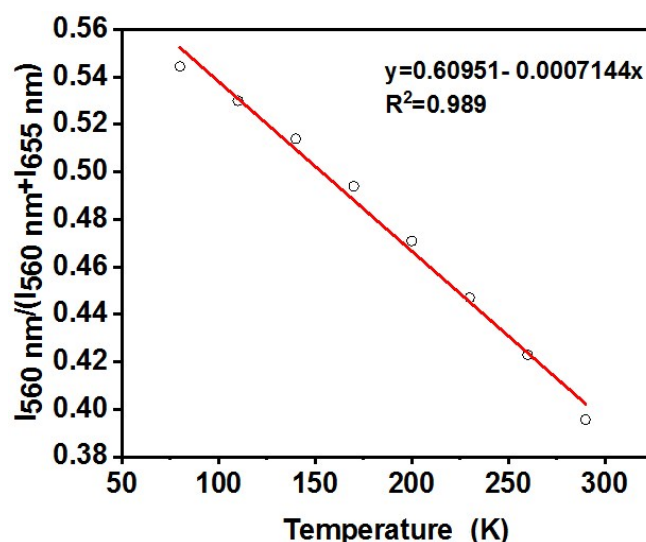

Fig. S11 The working curve and equation of the Cu<sub>8</sub> ( $\lambda_{\text{ex}} = 405 \text{ nm}$ ).

Table S1 Crystal Data and Structure Refinement for Cu<sub>8</sub> and Cu<sub>13</sub>.

| Compound                               | Cu <sub>13</sub>                                                                                    | Cu <sub>8</sub>                                                                 |
|----------------------------------------|-----------------------------------------------------------------------------------------------------|---------------------------------------------------------------------------------|
| empirical formula                      | C <sub>159</sub> H <sub>143</sub> Cl <sub>18</sub> Cu <sub>13</sub> P <sub>4</sub> Se <sub>13</sub> | C <sub>120</sub> H <sub>100</sub> Cu <sub>8</sub> P <sub>4</sub> S <sub>8</sub> |
| $M_r$                                  | 4668.21                                                                                             | 2430.67                                                                         |
| temperature/K                          | 296(2)                                                                                              | 296(2)                                                                          |
| crystal system                         | triclinic                                                                                           | triclinic                                                                       |
| space group                            | P-1                                                                                                 | P-1                                                                             |
| $a/\text{\AA}$                         | 17.6959(19)                                                                                         | 12.1898(12)                                                                     |
| $b/\text{\AA}$                         | 19.509(2)                                                                                           | 14.6213(14)                                                                     |
| $c/\text{\AA}$                         | 25.994(3)                                                                                           | 17.0179(16)                                                                     |
| $\alpha/^\circ$                        | 79.2200(10)                                                                                         | 73.7510(10)                                                                     |
| $\beta/^\circ$                         | 87.641(2)                                                                                           | 70.7900(10)                                                                     |
| $\gamma/^\circ$                        | 63.6130(10)                                                                                         | 78.4410(10)                                                                     |
| volume/ $\text{\AA}^3$                 | 7888.1(15)                                                                                          | 2730.1(5)                                                                       |
| $Z$                                    | 2                                                                                                   | 1                                                                               |
| $\rho_{\text{calc}} \text{ g/cm}^3$    | 1.965                                                                                               | 2.276                                                                           |
| $\mu / \text{mm}^{-1}$                 | 5.110                                                                                               | 6.066                                                                           |
| F(000)                                 | 4564.0                                                                                              | 1783.0                                                                          |
| reflections collected                  | 61767                                                                                               | 21401                                                                           |
| $R_{\text{int}}$                       | 0.0523                                                                                              | 0.0256                                                                          |
| data/restraints/parameters             | 31370/2106/1648                                                                                     | 10887/720/631                                                                   |
| goodness-of-fit                        | 1.007                                                                                               | 1.041                                                                           |
| $R_1/wR_2 [I \geq 2\sigma(I)]^{a,b}$   | 0.0620/0.1522                                                                                       | 0.0432/0.1100                                                                   |
| $R_1/wR_2 [\text{all data}]^{a,b}$     | 0.1187/0.1752                                                                                       | 0.0635/0.1210                                                                   |
| largest residuals $e \text{ \AA}^{-3}$ | 3.08/-1.04                                                                                          | 1.59/-1.02                                                                      |
